# Supplementary material for: How Photochemically Consumed Volatile Organic Compounds Affect Ozone Formation: A Case Study in Chengdu, China
Source: MDPI journal article supplement (doi:10.3390/atmos13101534), 2022-09-20
Supplement: s1 [file s1]

# How photochemically consumed volatile organic compounds affect ozone formation: a case study in Chengdu, China

Hefan Liu <sup>1</sup>, Qinwen Tan <sup>1</sup>, Danlin Song <sup>1</sup>, Ning Wang <sup>1,2,\*</sup>, Dongyang Chen <sup>2</sup> and Fengxia Huang <sup>1</sup>

- <sup>1</sup> Chengdu Academy of Environmental Sciences, Chengdu 610072, China; lhf@cdaes.cn (H.L.); tanqw@cdaes.cn (Q.T.); sdl@cdaes.cn (D.S.); hfx@cdaes.cn (F.H.)  
<sup>2</sup> College of Architecture and Environment, Sichuan University, Chengdu, 610065, China; dong-yang\_chen@stu.scu.edu.cn (D.C.)  
\* Correspondence: ningwang@stu.scu.edu.cn (N.W.)

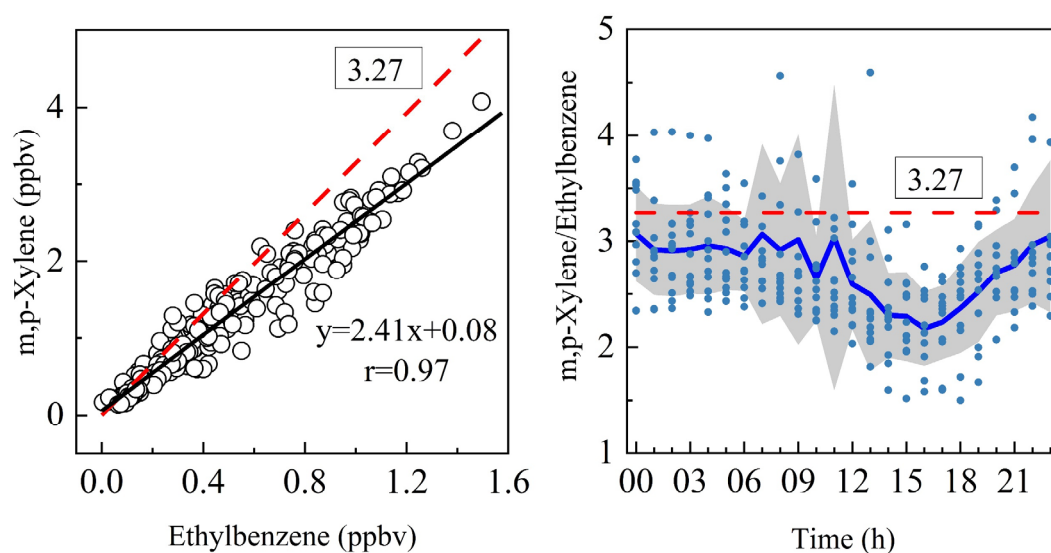

**Figure S1.** Scatterplot between m,p-xylene and ethylbenzene (left). Diurnal variation of m,p-xylene/ethylbenzene mixing ratio (right). The blue line represents the mean, and the gray area represents the standard deviation. The blue dots are the ratios of hourly measurements for each day during the observation period. The red dashed line shows the initial emission ratio of m,p-xylene/ethylbenzene estimated in this study (3.27 ppbv/ppbv).

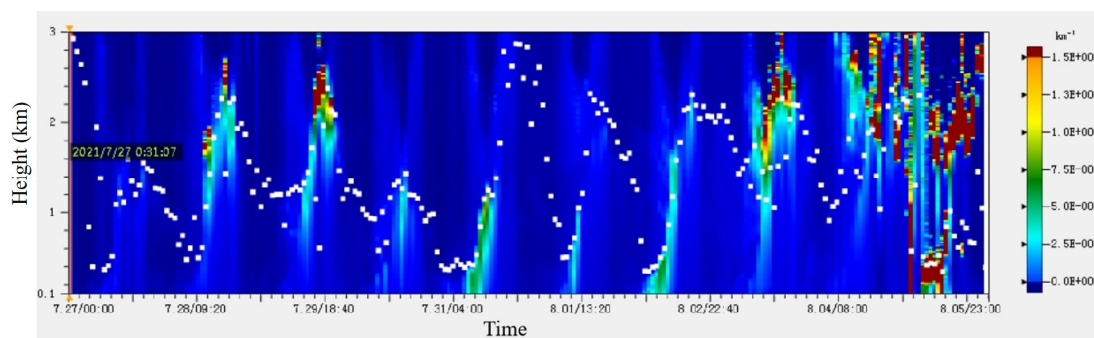

**Figure S2.** Inversion map of vertical diffusion data from aerosol lidar.

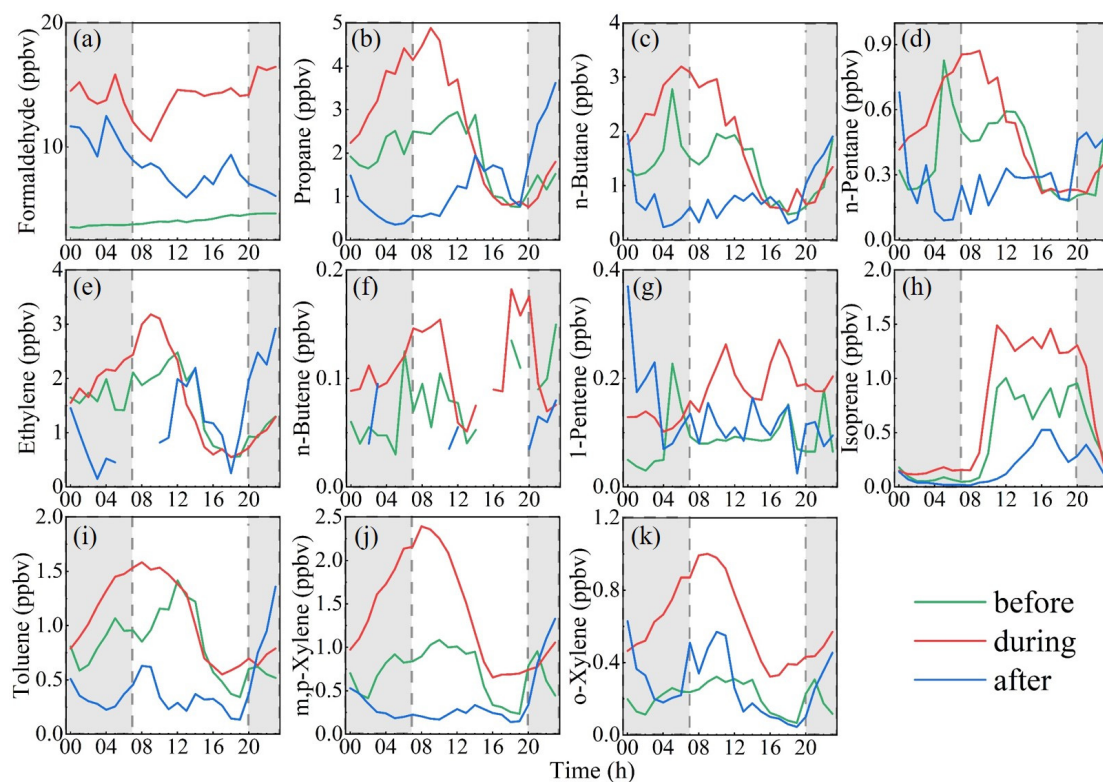

**Figure S3.** Diurnal and nocturnal variation of key VOC species (formaldehyde (a), alkanes (b–d), alkenes (e–h), aromatics (i–k)) before (25 July–26 July), during (27 July–4 August), and after (5 August) the pollution. The gray shaded area indicates nighttime (daytime: 7:00–20:00 (CNST); nighttime: 21:00–6:00 (CNST)).

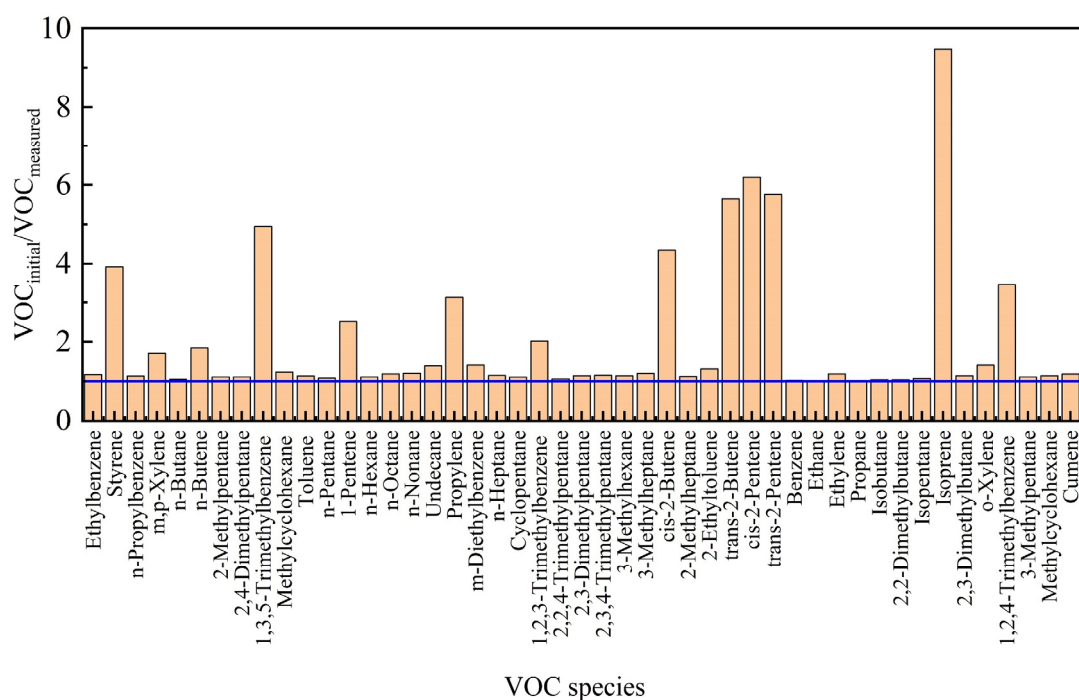

**Figure S4.** The ratios of initial/measured concentration of VOCs.

**Table S1.** The contributions of VOCs to OFP at Chengdu.

| Species<br>(n = 47) | MIR<br>(g·O <sub>3</sub> /g·VOC) | Concentration (μg/m <sup>3</sup> ) |       |        | OFP (μg/m <sup>3</sup> ) |       |        |
|---------------------|----------------------------------|------------------------------------|-------|--------|--------------------------|-------|--------|
|                     |                                  | Meas.                              | Cons. | PICs   | Meas.                    | Cons. | PICs   |
| <b>Alkanes</b>      |                                  | 30.768                             | 2.179 | 32.894 | 34.504                   | 2.912 | 37.355 |
| Ethane              | 0.28                             | 3.421                              | 0.017 | 3.434  | 0.958                    | 0.005 | 0.961  |
| Propane             | 0.49                             | 4.258                              | 0.089 | 4.347  | 2.086                    | 0.044 | 2.130  |
| n-Butane            | 1.15                             | 3.916                              | 0.172 | 4.068  | 4.504                    | 0.197 | 4.678  |
| Isobutane           | 1.23                             | 2.572                              | 0.102 | 2.664  | 3.164                    | 0.126 | 3.276  |
| Cyclopentane        | 2.39                             | 0.347                              | 0.038 | 0.384  | 0.828                    | 0.090 | 0.917  |
| n-Pentane           | 1.31                             | 1.338                              | 0.100 | 1.436  | 1.752                    | 0.132 | 1.880  |
| Isopentane          | 1.45                             | 5.082                              | 0.363 | 5.437  | 7.368                    | 0.527 | 7.884  |
| Methylcyclohexane   | 2.19                             | 1.041                              | 0.153 | 1.199  | 2.280                    | 0.335 | 2.625  |
| 2-Methylpentane     | 1.50                             | 1.664                              | 0.195 | 1.856  | 2.496                    | 0.293 | 2.784  |
| n-Hexane            | 1.24                             | 1.518                              | 0.175 | 1.688  | 1.882                    | 0.216 | 2.093  |
| 2,2-Dimethylbutane  | 1.17                             | 1.006                              | 0.048 | 1.055  | 1.177                    | 0.056 | 1.234  |
| 2,3-Dimethylbutane  | 0.97                             | 0.872                              | 0.134 | 1.006  | 0.846                    | 0.130 | 0.976  |
| 3-Methylpentane     | 1.80                             | 1.265                              | 0.159 | 1.419  | 2.277                    | 0.285 | 2.554  |
| Methylcyclohexane   | 1.70                             | 0.053                              | 0.012 | 0.065  | 0.090                    | 0.021 | 0.110  |
| 2,3-Dimethylpentane | 1.34                             | 0.063                              | 0.007 | 0.070  | 0.097                    | 0.011 | 0.108  |
| 2,4-Dimethylpentane | 1.55                             | 0.375                              | 0.048 | 0.424  | 0.401                    | 0.052 | 0.453  |
| 3-Methylhexane      | 1.61                             | 0.157                              | 0.023 | 0.180  | 0.210                    | 0.031 | 0.241  |
| n-Heptane           | 1.07                             | 0.485                              | 0.069 | 0.554  | 0.781                    | 0.111 | 0.892  |

|                        |       |        |        |        |         |         |         |
|------------------------|-------|--------|--------|--------|---------|---------|---------|
| 2,2,4-Trimethylpentane | 1.26  | 0.257  | 0.053  | 0.310  | 0.231   | 0.048   | 0.279   |
| 2,3,4-Trimethylpentane | 1.03  | 0.059  | 0.004  | 0.063  | 0.074   | 0.005   | 0.079   |
| 2-Methylheptane        | 1.07  | 0.423  | 0.061  | 0.484  | 0.435   | 0.063   | 0.499   |
| 3-Methylheptane        | 1.24  | 0.194  | 0.043  | 0.238  | 0.241   | 0.054   | 0.296   |
| n-Octane               | 0.90  | 0.119  | 0.015  | 0.134  | 0.127   | 0.016   | 0.143   |
| n-Nonane               | 0.78  | 0.137  | 0.029  | 0.164  | 0.107   | 0.022   | 0.128   |
| Undecane               | 0.61  | 0.148  | 0.069  | 0.217  | 0.090   | 0.042   | 0.133   |
| <b>Alkenes</b>         |       | 5.283  | 22.529 | 27.804 | 53.903  | 247.619 | 301.466 |
| Ethylene               | 9.00  | 1.932  | 0.336  | 2.259  | 17.387  | 3.027   | 20.330  |
| Propylene              | 11.66 | 0.198  | 0.181  | 0.379  | 2.308   | 2.109   | 4.417   |
| n-Butene               | 9.73  | 0.231  | 0.192  | 0.423  | 2.251   | 1.864   | 4.113   |
| cis-2-Butene           | 14.24 | 0.099  | 0.325  | 0.423  | 1.410   | 4.630   | 6.030   |
| trans-2-Butene         | 15.16 | 0.476  | 2.287  | 2.764  | 7.212   | 34.667  | 41.908  |
| Isoprene               | 10.61 | 1.538  | 16.910 | 18.448 | 16.318  | 179.412 | 195.731 |
| 1-Pentene              | 7.21  | 0.440  | 0.637  | 1.077  | 3.176   | 4.595   | 7.764   |
| cis-2-Pentene          | 10.38 | 0.294  | 1.259  | 1.555  | 3.049   | 13.068  | 16.137  |
| trans-2-Pentene        | 10.56 | 0.075  | 0.401  | 0.476  | 0.790   | 4.236   | 5.027   |
| <b>Aromatics</b>       |       | 15.641 | 7.963  | 23.599 | 86.848  | 53.089  | 139.988 |
| Benzene                | 0.72  | 1.306  | 0.034  | 1.336  | 0.940   | 0.024   | 0.962   |
| Toluene                | 4.00  | 3.648  | 0.487  | 4.135  | 14.590  | 1.948   | 16.537  |
| Styrene                | 1.73  | 0.472  | 1.428  | 1.902  | 0.817   | 2.470   | 3.290   |
| Ethylbenzene           | 3.04  | 2.037  | 0.361  | 2.382  | 6.194   | 1.098   | 7.242   |
| m,p-Xylene             | 7.80  | 5.229  | 3.605  | 8.849  | 40.781  | 28.115  | 69.023  |
| o-Xylene               | 7.64  | 2.280  | 1.020  | 3.300  | 17.422  | 7.793   | 25.215  |
| n-Propylbenzene        | 2.03  | 0.060  | 0.009  | 0.069  | 0.122   | 0.018   | 0.140   |
| 1,2,3-Trimethylbenzene | 11.97 | 0.054  | 0.198  | 0.251  | 0.630   | 2.326   | 2.955   |
| 1,2,4-Trimethylbenzene | 11.76 | 0.050  | 0.056  | 0.106  | 0.597   | 0.669   | 1.266   |
| 1,3,5-Trimethylbenzene | 11.76 | 0.080  | 0.028  | 0.107  | 0.445   | 0.154   | 0.597   |
| 2-Ethyltoluene         | 5.59  | 0.313  | 0.699  | 1.011  | 3.683   | 8.225   | 11.886  |
| Cumene                 | 2.52  | 0.037  | 0.007  | 0.044  | 0.094   | 0.018   | 0.111   |
| m-Diethylbenzene       | 7.10  | 0.075  | 0.032  | 0.107  | 0.530   | 0.229   | 0.758   |
| <b>NMHC</b>            |       | 51.692 | 32.671 | 84.298 | 175.254 | 303.620 | 478.809 |

\* Under normal temperature and pressure (25 °C, 101 kPa), the volume of 1 mol gas is  $22.4 \times (273 + 25) / 273 = 24.5$  L/mol. We converted ppbv to  $\mu\text{g}/\text{m}^3$  according to the following formula:

Mass concentration = Volume concentration  $\times$  Relative molecule Mass / 24.5
